# Supplementary material for: Development and validation of tools to screen occupational mental health and workplace factors influencing it: for the Indian workforce
Source: PubMed Central journal article supplement — Ind Health. 2022 May 11;61(3):184–94. doi: 10.2486/indhealth.2022-0019 (PMC10277194; doi:10.2486/indhealth.2022-0019), 2022-05-11
Supplement: indhealth-61-184_s001.pdf [file indhealth-61-184_s001.pdf]

Tool to screen workplace mental health and factors influencing it

1 Supplementary materials:

2 Supplementary tables

3 **Supplementary Table 1. Response pattern for the “Emotional Exhaustion” component of the Burnout screening tool: Pilot**  
 4 **phase (n=58)**

| Burnout screening tool: Emotional Exhaustion                                       | Never        | Sometimes    | Always       |
|------------------------------------------------------------------------------------|--------------|--------------|--------------|
|                                                                                    | <i>n</i> (%) | <i>n</i> (%) | <i>n</i> (%) |
| Are you demotivated to attend work                                                 | 28 (48.3)    | 21 (36.2)    | 9 (15.5)     |
| Does the thought of going to work put you down                                     | 37 (63.8)    | 16 (27.6)    | 5 (8.6)      |
| Does this work disinterest me                                                      | 42 (72.4)    | 12 (20.7)    | 4 (6.9)      |
| Do you work here solely for money and the job doesn’t motivate / encourage you     | 16 (27.6)    | 34 (58.6)    | 8 (13.8)     |
| Are you worried about attending work                                               | 32 (55.2)    | 20 (34.5)    | 6 (10.3)     |
| Do you continue to think about work related issues even during non-working hours   | 27 (46.6)    | 10 (17.2)    | 21 (36.2)    |
| Do you feel sleepless, loss of appetite due to continuous thoughts about work      | 49 (84.5)    | 4 (6.9)      | 5 (8.6)      |
| Do you feel lively while being at work*                                            | 7 (12.1)     | 4 (6.9)      | 47 (81)      |
| Do you feel frustrated by your work                                                | 44 (75.9)    | 10 (17.2)    | 4 (6.9)      |
| Are you satisfied with your work*                                                  | 3 (5.2)      | 5 (8.6)      | 50 (86.2)    |
| Does the thought of work prevent you from enjoying happiness with family & friends | 43 (74.1)    | 9 (15.5)     | 6 (10.3)     |

5 All questions are scored with “1”, “2” and “3” corresponding to “never”, “sometimes” and “always” while \*questions are scored in  
 6 opposite direction.

Tool to screen workplace mental health and factors influencing it

1 **Supplementary Table 2. Response pattern for the “Depersonalization” component of the Burnout screening tool: Pilot phase**  
 2 **(n=58)**

| Burnout screening tool: Depersonalization                                            | Never        | Sometimes    | Always       |
|--------------------------------------------------------------------------------------|--------------|--------------|--------------|
|                                                                                      | <i>n</i> (%) | <i>n</i> (%) | <i>n</i> (%) |
| Do you express anger at workplace due to work related stress / excess of work        | 40 (69)      | 11 (19)      | 7 (12.1)     |
| Does this job make you less caring / indifferent to your fellow colleagues / clients | 52 (89.7)    | 2 (3.4)      | 4 (6.9)      |
| Have you become insensitive to people around you, since you’ve been working here     | 53 (91.4)    | 1 (1.7)      | 4 (6.9)      |
| Do you almost lose patience by the end of the workday                                | 46 (79.3)    | 5 (8.6)      | 7 (12.1)     |
| Have you been responsible / felt guilty for your colleague’s / client’s problem(s)   | 46 (79.3)    | 7 (12.1)     | 5 (8.6)      |

3 All questions are scored with “1”, “2” and “3” corresponding to “never”, “sometimes” and “always”.

4

Tool to screen workplace mental health and factors influencing it

1 **Supplementary Table 3. Response pattern for the “Personal Accomplishment” component of the Burnout screening tool: Pilot**  
2 **phase (n=58)**

| Burnout screening tool: Personal accomplishment                                     | Never        | Sometimes    | Always       |
|-------------------------------------------------------------------------------------|--------------|--------------|--------------|
|                                                                                     | <i>n</i> (%) | <i>n</i> (%) | <i>n</i> (%) |
| Do you feel you’ve accomplished many worthwhile things in this job                  | 4 (6.9)      | 9 (15.5)     | 45 (77.6)    |
| Do you satisfactorily complete your work for the day                                | 3 (5.2)      | 0 (0)        | 55 (94.8)    |
| Are you satisfied with your efforts in keeping the work atmosphere calm and relaxed | 0 (0)        | 1 (1.7)      | 57 (98.3)    |

3 All questions are scored with “1”, “2” and “3” corresponding to “always”, “sometimes” and “never”.

4

Tool to screen workplace mental health and factors influencing it

1 **Supplementary Table 4. Response pattern for the “Workload” component of workplace screening tool: Pilot phase (n=57<sup>^</sup>)**

| Workplace screening tool: Work load                                                                                    | Never<br><i>n</i> (%) | Sometimes<br><i>n</i> (%) | Always<br><i>n</i> (%) |
|------------------------------------------------------------------------------------------------------------------------|-----------------------|---------------------------|------------------------|
| Do you have to do a lot of work in this job                                                                            | 44 (77.2)             | 11 (19.3)                 | 2 (3.5)                |
| Are you able to develop sufficient time for your domestic and personal work, considering the quantum of official work* | 10 (17.5)             | 29 (50.9)                 | 18 (31.6)              |
| Do you have to work, that requires more than one person to do                                                          | 20 (35.1)             | 28 (49.1)                 | 9 (15.8)               |
| Do you feel completing your assignments personally unsatisfied on account of excessive work and lack of time           | 15 (26.3)             | 32 (56.1)                 | 10 (17.5)              |
| Do you have to work under tense circumstances (due to excessive work)                                                  | 28 (49.1)             | 21 (36.8)                 | 8 (14)                 |

2 All questions are scored with “1”, “2” and “3” corresponding to “never”, “sometimes” and “always” while \*questions are scored in  
3 opposite direction.

4 <sup>^</sup> One of the participant did not consent to respond to the workplace screening tool, hence the final number of participant were 57.

5

Tool to screen workplace mental health and factors influencing it

1 **Supplementary Table 5. Response pattern for “Control” component of workplace screening tool: Pilot phase (n=57<sup>^</sup>)**

| Workplace screening tool: Work load                                                                                 | Never<br><i>n</i> (%) | Sometimes<br><i>n</i> (%) | Always<br><i>n</i> (%) |
|---------------------------------------------------------------------------------------------------------------------|-----------------------|---------------------------|------------------------|
| Do you feel your officials often interfere with your working methods                                                | 30 (52.6)             | 15 (26.3)                 | 12 (21.1)              |
| Do you feel the instructions provided by your multiple officers are contradictory, vague, insufficient or confusing | 18 (31.6)             | 32 (56.1)                 | 7 (12.3)               |
| Does you feel like working with unwillingness owing to certain group / political pressure                           | 23 (40.4)             | 30 (52.6)                 | 4 (7)                  |
| Are you forced to violate the formal administrative procedures and policies owing to group/political pressures      | 18 (31.6)             | 36 (63.2)                 | 3 (5.3)                |
| Does your work role frequently change                                                                               | 26 (46.4)             | 19 (33.9)                 | 11 (19.6)              |
| Are your suggestions noticed and implemented at your office*                                                        | 4 (7.1)               | 10 (17.9)                 | 42 (75)                |

2 All questions are scored with “1”, “2” and “3” corresponding to “never”, “sometimes” and “always” while \*questions are scored in  
3 opposite direction.

4 <sup>^</sup> One of the participant did not consent to respond to the workplace screening tool, hence the final number of participant were 57.

5

6

Tool to screen workplace mental health and factors influencing it

1 **Supplementary Table 6. Response pattern for “Reward” component of the workplace screening tool: Pilot phase (n=57<sup>^</sup>)**

| Workplace screening tool: Reward                                                                           | Never        | Sometimes    | Always       |
|------------------------------------------------------------------------------------------------------------|--------------|--------------|--------------|
|                                                                                                            | <i>n</i> (%) | <i>n</i> (%) | <i>n</i> (%) |
| Do you get less salary in comparison to the quantum of your labor/work                                     | 12 (21.1)    | 24 (42.1)    | 21 (36.8)    |
| Are you appropriately rewarded for your hard work/labor and efficient performance*                         | 39 (68.)     | 17 (29.8)    | 1 (1.8)      |
| Do you feel the working conditions are satisfactory from the point of view of our welfare and convenience* | 51 (89.5)    | 5 (8.8)      | 1 (1.85)     |

2 All questions are scored with “1”, “2” and “3” corresponding to “never”, “sometimes” and “always” while \*questions are scored in  
 3 opposite direction.

4 <sup>^</sup> One of the participant did not consent to respond to the workplace screening tool, hence the final number of participant were 57.

5

Tool to screen workplace mental health and factors influencing it

1 **Supplementary Table 7. Response pattern for the “Community cooperation” component of the workplace screening tool: Pilot**  
 2 **phase (n=5<sup>^</sup>7)**

| Workplace screening tool: Community                                                                                  | Never        | Sometimes    | Always       |
|----------------------------------------------------------------------------------------------------------------------|--------------|--------------|--------------|
|                                                                                                                      | <i>n</i> (%) | <i>n</i> (%) | <i>n</i> (%) |
| Do your colleagues at workplace voluntarily cooperate with you                                                       | 0 (0)        | 5 (8.8)      | 52 (91.2)    |
| Do you feel sufficient mutual co-operation and team spirit exists among the employees of the organization/department | 1 (1.7)      | 1 (1.7)      | 55 (96.5)    |
| Does the workplace permit you to communicate with your colleagues                                                    | 1 (1.7)      | 1 (1.7)      | 55 (96.5)    |

3 All questions are scored with “1”, “2” and “3” corresponding to “always”, “sometimes” and “never”.

4 <sup>^</sup> One of the participant did not consent to respond to the workplace screening tool, hence the final number of participant were 57.

5

6

Tool to screen workplace mental health and factors influencing it

1 **Supplementary Table 8. Response pattern for the “Fairness” component of the workplace screening tool: Pilot phase (n=57<sup>^</sup>)**

| Workplace screening tool: Community                                                    | Never        | Sometimes    | Always       |
|----------------------------------------------------------------------------------------|--------------|--------------|--------------|
|                                                                                        | <i>n</i> (%) | <i>n</i> (%) | <i>n</i> (%) |
| Are you being treated equally (/the same way) as other colleagues at workplace*        | 2 (3.5)      | 1 (1.8)      | 54 (94.7)    |
| Do you feel your higher authorities do not give due significance to your post and work | 23 (45.6)    | 26 (44.8)    | 8 (14)       |
| Do your work conditions permit you to express your concerns*                           | 2 (3.5)      | 1 (1.8)      | 54 (94.7)    |
| Are your opinions usually condemned despite other colleagues appreciating it           | 16 (28.6)    | 31 (55.4)    | 9 (16.1)     |

2 All questions are scored with “1”, “2” and “3” corresponding to “always”, “sometimes” and “never” while \*questions are scored in  
 3 opposite direction.

4 <sup>^</sup> One of the participant did not consent to respond to the workplace screening tool, hence the final number of participant were 57.

5

6



Tool to screen workplace mental health and factors influencing it

1 **Supplementary table 9. Response pattern for the “Values” component of the workplace screening tool: Pilot phase (n=57<sup>^</sup>)**

| Workplace screening tool: Community                                        | Never        | Sometimes    | Always       |
|----------------------------------------------------------------------------|--------------|--------------|--------------|
|                                                                            | <i>n</i> (%) | <i>n</i> (%) | <i>n</i> (%) |
| Does your higher authority care for your self-respect                      | 0 (0)        | 2 (3.5)      | 55 (96.5)    |
| Do you feel your job enhances your social status                           | 0 (0)        | 8 (14)       | 49 (86)      |
| Do you get sufficient opportunity to improve your proficiency and attitude | 0 (0)        | 8 (14)       | 49 (86)      |
| Do you often feel your Job as boring*                                      | 42 (73.7)    | 9 (15.5)     | 6 (10.5)     |

2 All questions are scored with “1”, “2” and “3” corresponding to “always”, “sometimes” and “never” while \*questions are scored in  
 3 opposite direction.

4 <sup>^</sup> One of the participant did not consent to respond to the workplace screening tool, hence the final number of participant were 57.

5

Tool to screen workplace mental health and factors influencing it

1 **Supplementary Table 10. Response pattern for the GHQ – 5 for the validation phase (n=153)**

| General Health Questionnaire (GHQ) - 5                                 | Yes          | No           |
|------------------------------------------------------------------------|--------------|--------------|
|                                                                        | <i>n</i> (%) | <i>n</i> (%) |
| Have you recently lost much sleep over worry?                          | 34 (22.2)    | 119 (77.8)   |
| Have you recently felt constantly under strain?                        | 32 (20.9)    | 121 (79.1)   |
| Have you recently been able to enjoy normal day-to-day activities?     | 117 (76.5)   | 36 (23.5)    |
| Have you recently been feeling reasonably happy all things considered? | 114 (74.5)   | 39 (25.5)    |
| Have you recently been feeling unhappy and depressed?                  | 27 (17.6)    | 128 (82.4)   |

2

Tool to screen workplace mental health and factors influencing it

1 **Supplementary Table 11. Response pattern for the “Emotional Exhaustion” component of the Burnout screening tool:**

2 **Validation phase (n=153)**

| Burnout screening tool: Emotional Exhaustion                                       | Never        | Sometimes    | Always       |
|------------------------------------------------------------------------------------|--------------|--------------|--------------|
|                                                                                    | <i>n</i> (%) | <i>n</i> (%) | <i>n</i> (%) |
| Are you demotivated to attend work                                                 | 123 (80.4)   | 25 (16.3)    | 5 (3.3)      |
| Does the thought of going to work put you down                                     | 130 (85)     | 23 (15)      | 0 (0)        |
| Does this work disinterest me                                                      | 134 (87.6)   | 13 (8.5)     | 6 (3.9)      |
| Do you work here solely for money and the job doesn’t motivate / encourage you     | 117 (76.5)   | 30 (19.6)    | 6 (3.9)      |
| Are you worried about attending work                                               | 116 (75.8)   | 24 (15.7)    | 13 (8.5)     |
| Do you continue to think about work related issues even during non-working hours   | 91 (59.5)    | 41 (26.8)    | 21 (13.7)    |
| Do you feel sleepless, loss of appetite due to continuous thoughts about work      | 109 (71.2)   | 38 (24.8)    | 6 (3.9)      |
| Do you feel lively while being at work*                                            | 19 (12.4)    | 21 (13.7)    | 113 (73.9)   |
| Do you feel frustrated by your work                                                | 118 (77.1)   | 30 (19.6)    | 5 (3.3)      |
| Are you satisfied with your work*                                                  | 12 (7.8)     | 15 (9.8)     | 126 (82.4)   |
| Does the thought of work prevent you from enjoying happiness with family & friends | 103 (67.3)   | 34 (22.2)    | 16 (10.5)    |

3 All questions are scored with “1”, “2” and “3” corresponding to “never”, “sometimes” and “always” while \*questions are scored in  
 4 opposite direction.

Tool to screen workplace mental health and factors influencing it

1 **Supplementary Table 12. Response pattern for the “Depersonalization” component of the Burnout screening tool: Validation**  
 2 **phase (n=153)**

| Burnout screening tool: Depersonalization                                            | Never        | Sometimes    | Always       |
|--------------------------------------------------------------------------------------|--------------|--------------|--------------|
|                                                                                      | <i>n</i> (%) | <i>n</i> (%) | <i>n</i> (%) |
| Do you express anger at workplace due to work related stress / excess of work        | 104 (68)     | 45 (29.4)    | 4 (2.6)      |
| Does this job make you less caring / indifferent to your fellow colleagues / clients | 133 (86.9)   | 16 (10.5)    | 4 (2.6)      |
| Have you become insensitive to people around you, since you’ve been working here     | 135 (88.2)   | 16 (10.5)    | 2 (1.3)      |
| Do you almost lose patience by the end of the workday                                | 124 (81)     | 23 (15)      | 6 (3.9)      |
| Have you been responsible / felt guilty for your colleague’s / client’s problem(s)   | 121 (79.1)   | 28 (18.3)    | 4 (2.6)      |

3 All questions are scored with “1”, “2” and “3” corresponding to “never”, “sometimes” and “always”.

4

Tool to screen workplace mental health and factors influencing it

1 **Supplementary Table 13. Response pattern for “Personal Accomplishment” component of the Burnout screening tool:**

2 **Validation phase (n=153)**

| Burnout screening tool: Personal accomplishment                                     | Never        | Sometimes    | Always       |
|-------------------------------------------------------------------------------------|--------------|--------------|--------------|
|                                                                                     | <i>n</i> (%) | <i>n</i> (%) | <i>n</i> (%) |
| Do you feel you’ve accomplished many worthwhile things in this job                  | 1 (0.7)      | 12 (7.8)     | 140 (91.5)   |
| Do you satisfactorily complete your work for the day                                | 2 (1.3)      | 5 (3.3)      | 146 (95.4)   |
| Are you satisfied with your efforts in keeping the work atmosphere calm and relaxed | 2 (1.3)      | 5 (3.3)      | 146 (95.4)   |

3 All questions are scored with “1”, “2” and “3” corresponding to “always”, “sometimes” and “never”.

4

Tool to screen workplace mental health and factors influencing it

1 **Supplementary Table 14. Response pattern for “Workload” component of the workplace screening tool: Validation phase**

2 **(n=153)**

| Workplace screening tool: Work load                                                                                    | Never        | Sometimes    | Always       |
|------------------------------------------------------------------------------------------------------------------------|--------------|--------------|--------------|
|                                                                                                                        | <i>n</i> (%) | <i>n</i> (%) | <i>n</i> (%) |
| Do you have to do a lot of work in this job                                                                            | 77 (50.3)    | 46 (30.1)    | 30 (19.6)    |
| Are you able to develop sufficient time for your domestic and personal work, considering the quantum of official work* | 23 (15.6)    | 36 (23.5)    | 94 (61.4)    |
| Do you have to work, that requires more than one person to do                                                          | 86 (56.2)    | 46 (30.1)    | 21 (13.7)    |
| Do you feel completing your assignments personally unsatisfied on account of excessive work and lack of time           | 114 (74.5)   | 23 (15)      | 16 (10.5)    |
| Do you have to work under tense circumstances (due to excessive work)                                                  | 117 (76.5)   | 28 (18.3)    | 8 (5.2)      |

3 All questions are scored with “1”, “2” and “3” corresponding to “never”, “sometimes” and “always” while \*questions are scored in

4 opposite direction.

Tool to screen workplace mental health and factors influencing it

1 **Supplementary Table 15. Response pattern for “Reward” component of the workplace screening tool: Validation phase**  
 2 **(n=153)**

| Workplace screening tool: Reward                                                                           | Never        | Sometimes    | Always       |
|------------------------------------------------------------------------------------------------------------|--------------|--------------|--------------|
|                                                                                                            | <i>n</i> (%) | <i>n</i> (%) | <i>n</i> (%) |
| Do you get less salary in comparison to the quantum of your labor/work                                     | 55 (35.9)    | 34 (22.2)    | 64 (41.8)    |
| Are you appropriately rewarded for your hard work/labor and efficient performance*                         | 34 (22.2)    | 44 (28.8)    | 75 (49)      |
| Do you feel the working conditions are satisfactory from the point of view of our welfare and convenience* | 32 (20.9)    | 33 (21.6)    | 88 (57.5)    |

3 All questions are scored with “1”, “2” and “3” corresponding to “never”, “sometimes” and “always” while \*questions are scored in  
 4 opposite direction.

Tool to screen workplace mental health and factors influencing it

1 **Supplementary Table 16. Response pattern for the “Community Cooperation” component of the workplace screening tool:**

2 **Validation phase (n=153)**

| Workplace screening tool: Community                                                                                  | Never        | Sometimes    | Always       |
|----------------------------------------------------------------------------------------------------------------------|--------------|--------------|--------------|
|                                                                                                                      | <i>n</i> (%) | <i>n</i> (%) | <i>n</i> (%) |
| Do your colleagues at workplace voluntarily cooperate with you                                                       | 2 (1.3)      | 9 (5.9)      | 142 (92.8)   |
| Do you feel sufficient mutual co-operation and team spirit exists among the employees of the organization/department | 2 (1.3)      | 7 (4.6)      | 144 (94.1)   |
| Does the workplace permit you to communicate with your colleagues                                                    | 2 (1.3)      | 4 (2.6)      | 147 (96.1)   |

3 All questions are scored with “1”, “2” and “3” corresponding to “always”, “sometimes” and “never”.

4



Tool to screen workplace mental health and factors influencing it

**Supplement Table 17. Kaiser-Meyer-Olkin (KMO) measure for each of the burnout questions**

| Questions                                                                            | KMO measure |
|--------------------------------------------------------------------------------------|-------------|
| <b>Emotional Exhaustion</b>                                                          |             |
| Are you demotivated to attend work                                                   | 0.781       |
| Does the thought of going to work put you down                                       | 0.778       |
| Does this work disinterest me                                                        | 0.669       |
| Do you work here solely for money and the job doesn't motivate / encourage you       | 0.502       |
| Are you worried about attending work                                                 | 0.796       |
| Do you continue to think about work related issues even during non-working hours     | 0.849       |
| Do you feel sleepless, loss of appetite due to continuous thoughts about work        | 0.887       |
| Do you feel lively while being at work                                               | 0.815       |
| Do you feel frustrated by your work                                                  | 0.878       |
| Are you satisfied with your work                                                     | 0.545       |
| Does the thought of work prevent you from enjoying happiness with family & friends   | 0.841       |
| <b>Depersonalization</b>                                                             |             |
| Do you express anger at workplace due to work related stress / excess of work        | 0.781       |
| Does this job make you less caring / indifferent to your fellow colleagues / clients | 0.713       |
| Have you become insensitive to people around you, since you've been working here     | 0.796       |
| Do you almost lose patience by the end of the workday                                | 0.830       |
| Have you been responsible / felt guilty for your colleague's / client's problem(s)   | 0.653       |
| <b>Personal accomplishments</b>                                                      |             |
| Do you feel you've accomplished many worthwhile things in this job                   | 0.769       |
| Do you satisfactorily complete your work for the day                                 | 0.615       |
| Are you satisfied with your efforts in keeping the work atmosphere calm and relaxed  | 0.782       |

As KMO measure for each of the questions were > 0.5, therefore all the questions were retained.

Tool to screen workplace mental health and factors influencing it

1 **Supplement Table 18. Rotated structured matrix for principal component analysis with varimax rotation of burnout screening**  
 2 **questionnaire**

| Questions                                                                          | Component    |              |              |        |              | Commonality |
|------------------------------------------------------------------------------------|--------------|--------------|--------------|--------|--------------|-------------|
|                                                                                    | 1            | 2            | 3            | 4      | 5            |             |
| <b>Emotional Exhaustion</b>                                                        |              |              |              |        |              |             |
| Are you demotivated to attend work                                                 | -0.023       | 0.122        | <b>0.66</b>  | 0.233  | -0.006       | 0.506       |
| Does the thought of going to work put you down                                     | 0.256        | 0.084        | <b>0.734</b> | -0.181 | 0.094        | 0.653       |
| Does this work disinterest me                                                      | -0.026       | <b>0.793</b> | 0.003        | 0.075  | 0.089        | 0.662       |
| Do you work here solely for money and the job doesn't motivate / encourage you     | -0.055       | 0.056        | -0.013       | -0.003 | <b>0.827</b> | 0.691       |
| Are you worried about attending work                                               | <b>0.531</b> | 0.471        | 0.016        | -0.089 | -0.036       | 0.517       |
| Do you continue to think about work related issues even during non-working hours   | <b>0.604</b> | -0.13        | 0.419        | 0.054  | 0.023        | 0.561       |
| Do you feel sleepless, loss of appetite due to continuous thoughts about work      | <b>0.526</b> | 0.003        | 0.411        | 0.187  | 0.348        | 0.602       |
| Do you feel lively while being at work                                             | <b>0.521</b> | 0.302        | 0.093        | 0.126  | -0.138       | 0.462       |
| Do you feel frustrated by your work                                                | <b>0.512</b> | 0.348        | 0.215        | 0.299  | 0.322        | 0.533       |
| Are you satisfied with your work                                                   | 0.002        | -0.027       | 0.061        | 0.054  | <b>0.897</b> | 0.812       |
| Does the thought of work prevent you from enjoying happiness with family & friends | <b>0.612</b> | 0.122        | 0.012        | 0.096  | 0.13         | 0.46        |
| <b>Depersonalization</b>                                                           |              |              |              |        |              |             |
| Do you express anger at workplace due to work related stress / excess of work      | <b>0.67</b>  | 0.127        | 0.299        | 0.074  | -0.049       | 0.628       |

Tool to screen workplace mental health and factors influencing it

| Questions                                                                            | Component    |              |              |              |        | Commonality |
|--------------------------------------------------------------------------------------|--------------|--------------|--------------|--------------|--------|-------------|
|                                                                                      | 1            | 2            | 3            | 4            | 5      |             |
| Does this job make you less caring / indifferent to your fellow colleagues / clients | 0.161        | <b>0.83</b>  | 0.145        | 0.009        | -0.026 | 0.768       |
| Have you become insensitive to people around you, since you've been working here     | 0.267        | <b>0.604</b> | 0.352        | 0.2          | -0.065 | 0.661       |
| Do you almost lose patience by the end of the workday                                | 0.256        | 0.341        | <b>0.522</b> | 0.126        | 0.186  | 0.517       |
| Have you been responsible / felt guilty for your colleague's / client's problem(s)   | <b>0.519</b> | 0.095        | -0.229       | 0.156        | 0.15   | 0.473       |
| <b>Personal accomplishments</b>                                                      |              |              |              |              |        |             |
| Do you feel you've accomplished many worthwhile things in this job                   | 0.101        | 0.195        | -0.012       | <b>0.779</b> | 0.197  | 0.7         |
| Do you satisfactorily complete your work for the day                                 | -0.177       | -0.084       | 0.432        | <b>0.639</b> | -0.116 | 0.672       |
| Are you satisfied with your efforts in keeping the work atmosphere calm and relaxed  | 0.304        | 0.01         | 0.018        | <b>0.786</b> | 0.03   | 0.712       |

1 Loadings with > 0.5 are reported in bold.

Tool to screen workplace mental health and factors influencing it

1

2 **Supplement Table 19. Kaiser-Meyer-Olkin (KMO) measure for each the workplace domain questions**

| Questions                                                                                                              | KMO measure |
|------------------------------------------------------------------------------------------------------------------------|-------------|
| <b>Work load</b>                                                                                                       |             |
| Do you have to do a lot of work in this job                                                                            | 0.831       |
| Are you able to develop sufficient time for your domestic and personal work, considering the quantum of official work* | 0.78        |
| Do you have to work, that requires more than one person to do                                                          | 0.85        |
| Do you feel completing your assignments personally unsatisfied on account of excessive work and lack of time           | 0.836       |
| Do you have to work under tense circumstances (due to excessive work)                                                  | 0.817       |
| <b>Reward</b>                                                                                                          |             |
| Do you get less salary in comparison to the quantum of your labor/work                                                 | 0.839       |
| Are you appropriately rewarded for your hard work/labor and efficient performance*                                     | 0.657       |
| Do you feel the working conditions are satisfactory from the point of view of our welfare and convenience*             | 0.691       |
| <b>Community</b>                                                                                                       |             |
| Do your colleagues at workplace voluntarily cooperate with you                                                         | 0.647       |
| Do you feel sufficient mutual co-operation and team spirit exists among the employees of the organization/department   | 0.687       |
| Does the workplace permit you to communicate with your colleagues                                                      | 0.502       |

3 The KMO measure for each questions was > 0.5 hence all the questions were retained.

Tool to screen workplace mental health and factors influencing it

1 **Supplement Table 20. Rotated structured matrix for principal component analysis with varimax rotation of the workplace**  
 2 **screening questionnaire**

| Questions                                                                                                              | Component    |              |              |              | Commonality |
|------------------------------------------------------------------------------------------------------------------------|--------------|--------------|--------------|--------------|-------------|
|                                                                                                                        | 1            | 2            | 3            | 4            |             |
| <b>Work load</b>                                                                                                       |              |              |              |              |             |
| Do you have to do a lot of work in this job                                                                            | <b>0.806</b> | -0.053       | 0.116        | -0.060       | 0.669       |
| Are you able to develop sufficient time for your domestic and personal work, considering the quantum of official work* | <b>0.856</b> | 0.156        | 0.153        | 0.074        | 0.786       |
| Do you have to work, that requires more than one person to do                                                          | <b>0.77</b>  | -0.021       | 0.151        | -0.002       | 0.616       |
| Do you feel completing your assignments personally unsatisfied on account of excessive work and lack of time           | <b>0.615</b> | 0.426        | 0.054        | 0.165        | 0.534       |
| Do you have to work under tense circumstances (due to excessive work)                                                  | <b>0.672</b> | 0.353        | -0.160       | 0.071        | 0.664       |
| <b>Reward</b>                                                                                                          |              |              |              |              |             |
| Do you get less salary in comparison to the quantum of your labor/work                                                 | 0.135        | 0.020        | 0.295        | <b>0.582</b> | 0.444       |
| Are you appropriately rewarded for your hard work/labor and efficient performance*                                     | 0.133        | 0.001        | <b>0.802</b> | -0.068       | 0.66        |
| Do you feel the working conditions are satisfactory from the point of view of our welfare and convenience*             | 0.065        | 0.174        | <b>0.779</b> | 0.132        | 0.665       |
| <b>Community</b>                                                                                                       |              |              |              |              |             |
| Do your colleagues at workplace voluntarily cooperate with you                                                         | 0.111        | <b>0.826</b> | 0.103        | -0.134       | 0.724       |
| Do you feel sufficient mutual co-operation and team spirit exists among the employees of the organization/department   | 0.106        | <b>0.822</b> | 0.083        | 0.108        | 0.705       |
| Does the workplace permit you to communicate with your colleagues                                                      | 0.044        | <b>0.842</b> | 0.015        | 0.160        | 0.737       |

3 Loadings with > 0.5 are reported in bold.

Tool to screen workplace mental health and factors influencing it

**Supplement Table 21. Number of participants randomly dichotomized as 2 groups, ensuring equal representation of the various occupational groups**

| <b>S. N.</b> | <b>Occupations</b>                                            | <b>Random group 1</b> | <b>Random group 2</b> |
|--------------|---------------------------------------------------------------|-----------------------|-----------------------|
| 1.           | Outdoor data collection                                       | 7                     | 7                     |
| 2.           | Paramedical staff (outdoors) / drivers                        | 10                    | 9                     |
| 3.           | Administrative / indoor desk job workers                      | 3                     | 3                     |
| 4.           | Nurse                                                         | 15                    | 14                    |
| 5.           | Doctor                                                        | 11                    | 12                    |
| 6.           | Laboratory staff                                              | 8                     | 8                     |
| 7.           | Sanitary workers / outdoor workers / security guards / police | 23                    | 23                    |
| <b>Total</b> |                                                               | <b>77</b>             | <b>76</b>             |

All of the three randomization phases included the same number of participants.

Tool to screen workplace mental health and factors influencing it

**Supplement Table 22. Significance (*p* value) of the group differences in responses obtained for GHQ-5, burnout and workplace factors questions, between randomly dichotomized groups. Results from all 3 randomizations**

| S.<br>N.                                        | Questions                                                                          | <i>P</i> values obtained by chi-square test<br>between the groups |          |              |
|-------------------------------------------------|------------------------------------------------------------------------------------|-------------------------------------------------------------------|----------|--------------|
|                                                 |                                                                                    | Random 1                                                          | Random 2 | Random 3     |
| <b>General Health Questionnaire – 5 (GHQ-5)</b> |                                                                                    |                                                                   |          |              |
| 1.                                              | Have you recently lost much sleep over worry?                                      | 0.99                                                              | 0.7      | 0.4          |
| 2.                                              | Have you recently felt constantly under strain?                                    | 0.7                                                               | 0.43     | 0.07         |
| 3.                                              | Have you recently been able to enjoy normal day-to-day activities?                 | 0.34                                                              | 0.34     | <b>0.03*</b> |
| 4.                                              | Have you recently been feeling reasonably happy all things considered?             | 0.2                                                               | 0.36     | 0.06         |
| 5.                                              | Have you recently been feeling unhappy and depressed?                              | 0.84                                                              | 0.84     | 0.27         |
|                                                 | Requiring detailed evaluation based on GHQ-5 screening                             | 0.99                                                              | 0.29     | 0.07         |
| <b>Burnout: Emotional Exhaustion</b>            |                                                                                    |                                                                   |          |              |
| 1.                                              | Are you demotivated to attend work                                                 | 0.39                                                              | 0.34     | 0.28         |
| 2.                                              | Does the thought of going to work put you down                                     | 0.12                                                              | 0.99     | 0.12         |
| 3.                                              | Does this work disinterest me                                                      | 0.48                                                              | 0.68     | 0.51         |
| 4.                                              | Do you work here solely for money and the job doesn't motivate / encourage you     | 0.67                                                              | 0.18     | 0.69         |
| 5.                                              | Are you worried about attending work                                               | 0.1                                                               | 0.65     | 0.09         |
| 6.                                              | Do you continue to think about work related issues even during non-working hours   | 0.41                                                              | 0.47     | 0.7          |
| 7.                                              | Do you feel sleepless, loss of appetite due to continuous thoughts about work      | 0.24                                                              | 0.91     | 0.72         |
| 8.                                              | Do you feel lively while being at work                                             | 0.08                                                              | 0.57     | 0.3          |
| 9.                                              | Do you feel frustrated by your work                                                | 0.31                                                              | 0.47     | 0.3          |
| 10.                                             | Are you satisfied with your work                                                   | 0.97                                                              | 0.55     | 0.82         |
| 11.                                             | Does the thought of work prevent you from enjoying happiness with family & friends | 0.83                                                              | 0.14     | 0.8          |

Tool to screen workplace mental health and factors influencing it

| S.<br>N.                                 | Questions                                                                                                             | <i>P values obtained by chi-square test<br/>between the groups</i> |          |          |
|------------------------------------------|-----------------------------------------------------------------------------------------------------------------------|--------------------------------------------------------------------|----------|----------|
|                                          |                                                                                                                       | Random 1                                                           | Random 2 | Random 3 |
| <b>Burnout: Depersonalization</b>        |                                                                                                                       |                                                                    |          |          |
| 1.                                       | Do you express anger at workplace due to work related stress / excess of work                                         | 0.34                                                               | 0.02     | 0.64     |
| 2.                                       | Does this job make you less caring / indifferent to your fellow colleagues / clients                                  | 0.59                                                               | 0.52     | 0.3      |
| 3.                                       | Have you become insensitive to people around you, since you've been working here                                      | 0.88                                                               | 0.3      | 0.19     |
| 4.                                       | Do you almost lose patience by the end of the workday                                                                 | 0.81                                                               | 0.98     | 0.22     |
| 5.                                       | Have you been responsible / felt guilty for your colleague's / client's problem(s)                                    | 0.46                                                               | 0.99     | 0.99     |
| <b>Burnout: Personal accomplishments</b> |                                                                                                                       |                                                                    |          |          |
| 1.                                       | Do you feel you've accomplished many worthwhile things in this job                                                    | 0.6                                                                | 0.13     | 0.61     |
| 2.                                       | Do you satisfactorily complete your work for the day                                                                  | 0.32                                                               | 0.9      | 0.33     |
| 3.                                       | Are you satisfied with your efforts in keeping the work atmosphere calm and relaxed                                   | 0.32                                                               | 0.33     | 0.91     |
| <b>Workplace factors: Work load</b>      |                                                                                                                       |                                                                    |          |          |
| 1.                                       | Do you have to do a lot of work in this job                                                                           | 0.67                                                               | 0.89     | 0.38     |
| 2.                                       | Are you able to develop sufficient time for your domestic and personal work, considering the quantum of official work | 0.17                                                               | 0.85     | 0.76     |
| 3.                                       | Do you have to work, that requires more than one person to do                                                         | 0.98                                                               | 0.16     | 0.63     |
| 4.                                       | Do you feel completing your assignments personally unsatisfied on account of excessive work and lack of time          | 0.38                                                               | 0.97     | 0.77     |
| 5.                                       | Do you have to work under tense circumstances (due to excessive work)                                                 | 0.48                                                               | 0.9      | 0.72     |
| <b>Workplace factors: Reward</b>         |                                                                                                                       |                                                                    |          |          |
| 1.                                       | Do you get less salary in comparison to the quantum of your labor/work                                                | 0.4                                                                | 0.83     | 0.11     |



Tool to screen workplace mental health and factors influencing it

| S.<br>N.                            | Questions                                                                                                            | <i>P values obtained by chi-square test<br/>between the groups</i> |          |          |
|-------------------------------------|----------------------------------------------------------------------------------------------------------------------|--------------------------------------------------------------------|----------|----------|
|                                     |                                                                                                                      | Random 1                                                           | Random 2 | Random 3 |
| 2.                                  | Are you appropriately rewarded for your hard work/labor and efficient performance                                    | 0.9                                                                | 0.48     | 0.05     |
| 3.                                  | Do you feel the working conditions are satisfactory from the point of view of our welfare and convenience            | 0.1                                                                | 0.97     | 0.27     |
| <b>Workplace factors: Community</b> |                                                                                                                      |                                                                    |          |          |
| 1.                                  | Do your colleagues at workplace voluntarily cooperate with you                                                       | 0.95                                                               | 0.94     | 0.24     |
| 2.                                  | Do you feel sufficient mutual co-operation and team spirit exists among the employees of the organization/department | 0.92                                                               | 0.33     | 0.92     |
| 3.                                  | Does the workplace permit you to communicate with your colleagues                                                    | 0.22                                                               | 0.99     | 0.99     |

There were no statistical differences in the responses obtained between the randomly dichotomized groups.

\* Statistically significant different response between the randomly dichotomized groups (3<sup>rd</sup> randomization).

**Supplement Table 23. Mean  $\pm$  standard deviation of the total scores of the questionnaire, for the randomly dichotomized groups. Results from all 3 randomizations**

| Questions                                   | Randomization 1 |                 | Randomization 2 |                 | Randomization 3 |                 |
|---------------------------------------------|-----------------|-----------------|-----------------|-----------------|-----------------|-----------------|
|                                             | Group 1         | Group 2         | Group 1         | Group 2         | Group 1         | Group 2         |
| GHQ-5 total score (Max. 5)                  | 1.07 $\pm$ 1.3  | 1.13 $\pm$ 1.5  | 1.05 $\pm$ 1.4  | 1.15 $\pm$ 1.4  | 0.87 $\pm$ 1.3* | 1.32 $\pm$ 1.5  |
| Emotional exhaustion total score (Max. 22)  | 14 $\pm$ 2.8    | 14.68 $\pm$ 3.4 | 14.31 $\pm$ 3.3 | 14.38 $\pm$ 3   | 14.08 $\pm$ 3.1 | 14.62 $\pm$ 3.1 |
| Depersonalization total score (Max. 10)     | 6.09 $\pm$ 1.5  | 6.1 $\pm$ 1.6   | 6.16 $\pm$ 1.9  | 6.04 $\pm$ 1.2  | 5.89 $\pm$ 1.4  | 6.3 $\pm$ 1.7   |
| Reduced accomplishment total score (Max. 6) | 3.17 $\pm$ 0.6  | 3.25 $\pm$ 0.76 | 3.26 $\pm$ 0.8  | 3.16 $\pm$ 0.6  | 3.21 $\pm$ 0.7  | 3.21 $\pm$ 0.7  |
| Total burnout score (Max. 38)               | 23.27 $\pm$ 4.2 | 24.04 $\pm$ 4.9 | 23.73 $\pm$ 5.2 | 23.58 $\pm$ 3.9 | 23.18 $\pm$ 4.6 | 24.13 $\pm$ 4.6 |
| Workload total score (Max. 10)              | 7.4 $\pm$ 2.6   | 7.5 $\pm$ 2.8   | 7.32 $\pm$ 2.5  | 7.58 $\pm$ 2.8  | 7.23 $\pm$ 2.7  | 7.67 $\pm$ 2.7  |
| Reward total score (Max. 6)                 | 5.55 $\pm$ 1.7  | 5.3 $\pm$ 1.7   | 5.38 $\pm$ 1.7  | 5.47 $\pm$ 1.7  | 5.45 $\pm$ 1.6  | 5.39 $\pm$ 1.9  |
| Community total score (Max. 6)              | 3.22 $\pm$ 0.7  | 3.2 $\pm$ 0.5   | 3.17 $\pm$ 0.5  | 3.25 $\pm$ 0.7  | 3.23 $\pm$ 0.7  | 3.18 $\pm$ 0.5  |
| Total workplace score (Max. 22)             | 16.16 $\pm$ 3.7 | 16 $\pm$ 3.8    | 15.87 $\pm$ 3.5 | 16.3 $\pm$ 4    | 15.92 $\pm$ 3.8 | 16.25 $\pm$ 3.8 |

There were no statistical differences in the total scores between the randomly dichotomized groups.

\* Randomly dichotomized groups during 3<sup>rd</sup> randomization, were statistically different in total GHQ-5 scores

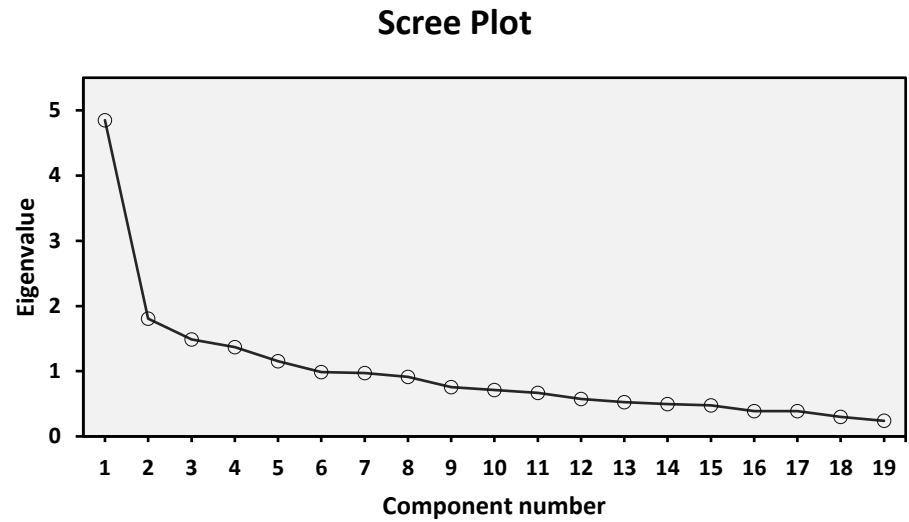

**Supplementary Fig. 1. Scree plot demonstrating inflection point, (one among the criteria for determining the number of components to retain for rotation and interpretation).**

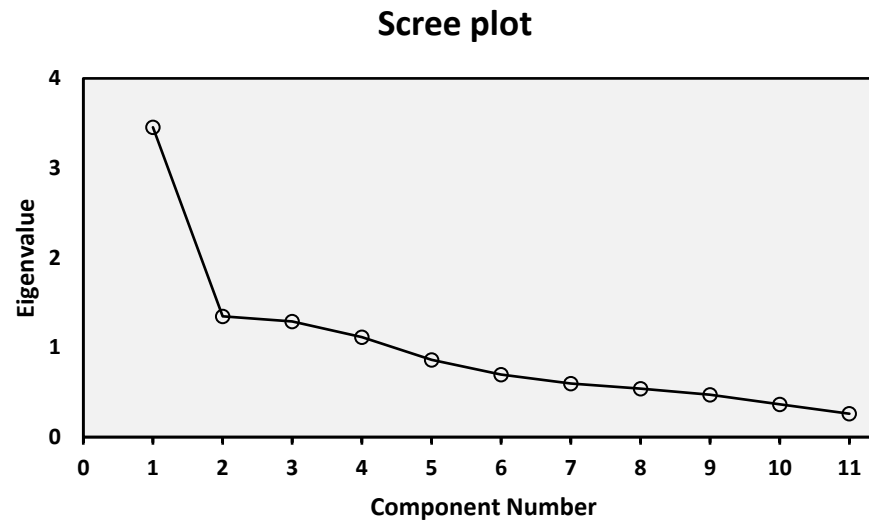

**Supplementary Fig. 2. Scree plot demonstrating inflection point, one among the criteria for used to determine the number of components to retain for rotation and interpretation.**

### Systematic review of Indian studies

Systematic review of Indian studies investigating the workplace mental health and workplace factors revealed usage of either western tools without prior validation or tools that fail to include all the constructs of burnout and workplace factors.

Majority of these studies used occupational stress index scale developed during 1981, which apparently investigates role overload, role ambiguity, role conflict, unreasonable group / political pressure, responsibility of the individuals, under participation, powerlessness, poor peer relations, intrinsic impoverishment, low status, strenuous working conditions and unprofitability. However with advancement in the understanding of organizational behavior, the workplace factors are categorized under workload, control, community cooperation, fairness, value and reward. Further, the mental health in the Indian studies are assessed with generic mental health tools, therefore specific assessment of occupational mental health is lacking in these studies.

### Summary of the Indian studies

Jain et al (2007) reported job satisfaction, organization climate and occupational stress among 158 workers employed at oil industry (Indian oil corporation), located at Mathura. The tools used include Job satisfaction scale, organizational climate scale and occupation stress index developed during mid-1980's and thereby these scales fail to capture the occupational mental health constructs such as depersonalization and perception of reduced accomplishment nor the workplace constructs namely "Value" and "Fairness".

Yadav & Nagle (2012) investigated the work alienation and occupational stress among 270 women (90 Nurses, 90 teachers and 90 office clerks). The cited study involved work alienation scale and

occupational stress index. These scales doesn't include all the constructs of burnout and workplace factors.

Sirajunnisa & Panchanatham (2010) reported an association between occupational stress and work life balance among 150 professional women (including lecturer, bank officer, doctor and engineer) residing at Tamil Nadu using Occupational stress index and work-life balance scale. The occupational stress index doesn't capture all the constructs of workplace factors, while the work-place balance is an extension of workload. Further, occupational mental health assessment is perhaps beyond the scope the cited study and hence not accessed.

Similarly, many studies have independently investigated the workplace factors using the occupational stress index, while the mental health using generic mental health questionnaire such as depression and somatic symptoms and such as "workload", "Control", "Community cooperation", "Value", "Reward" using non-validated western tools. The details of these studies are listed below.

| Study (site)       | Participant and workplace           | Workplace factors         | Psychological symptoms | Comments                                               |
|--------------------|-------------------------------------|---------------------------|------------------------|--------------------------------------------------------|
| Singh 2015         | 210 employees in manager positions  | Occupational stress index | -                      | Incomplete evaluation / screening of workplace factors |
| Mishra et al 2015  | Bank mangers                        | Occupational stress index | -                      | Incomplete evaluation / screening of workplace factors |
| Krishna et al 2015 | 76 Machine operators of steel plant | Occupational stress index | -                      | Incomplete evaluation / screening of workplace factors |

| Study (site)                               | Participant and workplace                | Workplace factors                            | Psychological symptoms | Comments                                                                                    |
|--------------------------------------------|------------------------------------------|----------------------------------------------|------------------------|---------------------------------------------------------------------------------------------|
| Soumyashree et al 2018<br>Karnataka        | 132 workers from stone crushing industry | Occupational stress index                    | -                      | Incomplete evaluation / screening of workplace factors                                      |
| Singh et al 2016 (Varnasi)                 | 210 executives                           | Occupational stress index                    | Depression             | Incomplete evaluation / screening of workplace factors and generic mental health assessment |
| Ali et al 2019, (Uttar pradesh)            | 335 bank employees                       | Occupational stress index                    |                        | Incomplete evaluation / screening of workplace factors                                      |
| Upadhyay & Singh 2017 (Varnasi)            | 104 female bank workers                  | Occupational stress index                    | -                      | Incomplete evaluation / screening of workplace factors                                      |
| Sahu & Pathardikar 2018 (Lucknow)          | Workers from manufacturing unit          | Occupational stress index & job satisfaction | -                      | Incomplete evaluation / screening of workplace factors                                      |
| Singh et al 2016 (Various cities in India) | 210 executive workers                    | Control., workload                           | Somatic symptoms       | Incomplete evaluation / screening of workplace factors and generic mental health assessment |
| Karim 2018 (Mizoram)                       | 84 bank employees                        | Occupational stress index                    | -                      | Incomplete evaluation / screening of workplace factors                                      |

References:

- Jain KK, Jabeen F, Mishra V, Gupta N. Job satisfaction as related to organizational climate and occupational stress: A case study of Indian Oil. *International Review of Business Research Papers*. 2007 Nov;3(5):193-208.
- Yadav GK, Nagle YK. Work alienation and occupational stress. *Social Science International*. 2012 Jul 1;28(2):333.
- Sirajunisa K, Panchanatham N. Influence of occupational stress on work life balance among women professionals. *The Journal of Commerce*. 2010 Oct 1;2(1):44.
- Singh AP, Singhi N. Organizational Role Stress and Social Support as Predictors of Job Satisfaction among Managerial Personnel. *Journal of Psychosocial Research*. 2015 Jan 1;10(1).
- Swati Mishra, S. M. Khan, P. C. Mishra An Application of Structural Equation Modelling to Search Antecedents Latent Variables in Organizational Health, Occupational Role Stress and Social Support for Organizational Commitment. *Journal of Organization and Human Behavior* 2015 4(2)
- Singh AP, Gupta VK, Dubey AP, Singh AK. Role of collectivism as a moderator between the relationship of organizational role stress and depressive symptoms among executives in private sector organizations. *Journal of Psychosocial Research*. 2016;11(1):55.
- Ali N, Miralam M. The effect of job stress and need deficiency on performance. *Management Science Letters*. 2019;9(6):945-56.
- Upadhyay A, Singh AP. Role of Occupational Stress and Social Support in Negative Mental Health among Women Employees in Banking Sectors. *Journal of the Indian Academy of Applied Psychology*. 2017 Jul 1;43(2):222-9.



- Sahu S, Pathardikar AD. Role ambiguity, job interdependence, trust and horizontal-flexible design affecting job satisfaction. *International Journal of Human Resources Development and Management*. 2018;18(3-4):282-96.
- Singh AP, Gupta VK, Dubey AP, Singh A. Role of occupational stress in the somatic health complaints among executives in public sector organizations. *Indian Journal of Health and Wellbeing*. 2016 Jun 1;7(6):600.
- Karim F. Singh N Rokendro, Work Stress among Employees of State Bank of India: A Study of Karimganj District, Assam, *International Journal of Management and Applied Science*. 2018. 4(7). 55-60.
